# Supplementary material
Source: Springer Nature journal article supplement (https://www.springermedizin.de/resource/supplementary/12967_2011_1078_MOESM7_ESM.pdf/9573664)

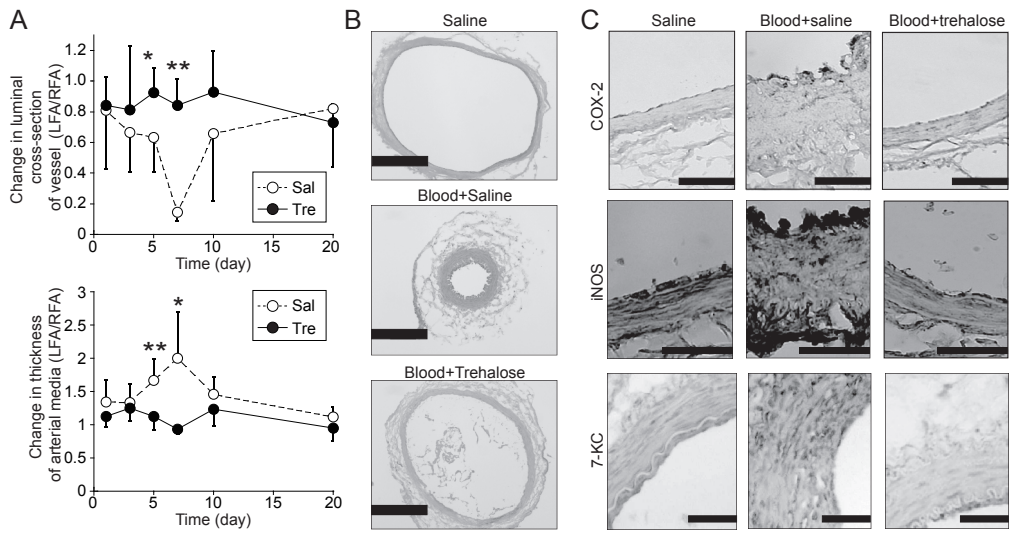

Figure 6. Echigo et al.

Supplement: MOESM7 [file 9573664]
